# Supplementary material for: Ba14Si4Sb8Te32(Te3): hypervalent Te in a new structure type with low thermal conductivity
Source: Royal Society of Chemistry journal article supplement (doi:10.1039/d3dt01532g), 2023-01-01
Supplement: d3dt01532g1.pdf [file d3dt01532g1.pdf]

## **Ba<sub>14</sub>Si<sub>4</sub>Sb<sub>8</sub>Te<sub>32</sub>(Te<sub>3</sub>): hypervalent Te in a new structure type with low thermal conductivity**

Subhendu Jana,<sup>a</sup> Sweta Yadav,<sup>a</sup> Swati,<sup>a</sup> Manish K. Niranjana,<sup>b</sup> and Jai Prakash<sup>a,\*</sup>

<sup>a</sup>Department of Chemistry, Indian Institute of Technology Hyderabad, Kandi, Sangareddy, Telangana 502284, India

<sup>b</sup>Department of Physics, Indian Institute of Technology Hyderabad, Kandi, Sangareddy, Telangana 502284, India

### **Electronic Supplementary Information (ESI)**

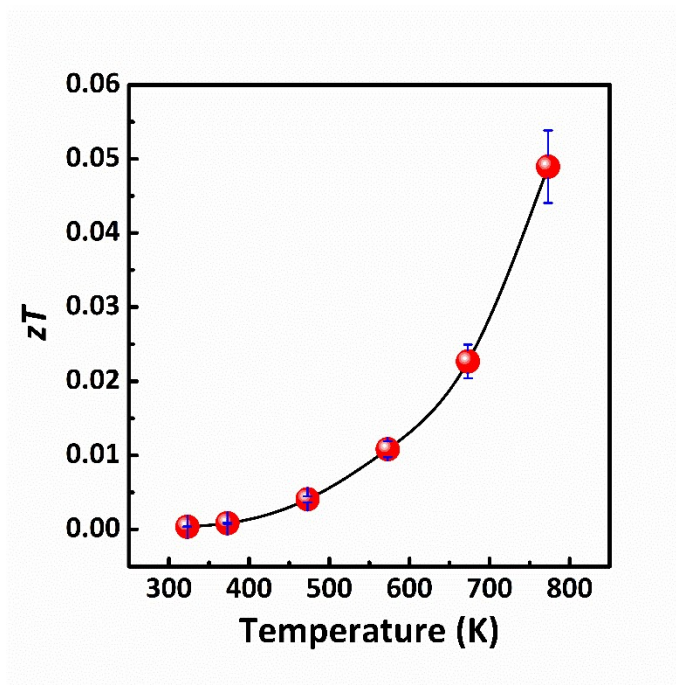

**Fig. S11: (a)** The variation of temperature-dependent thermoelectric figure of merit ( $zT$ ) for the polycrystalline Ba<sub>14</sub>Si<sub>4</sub>Sb<sub>8</sub>Te<sub>32</sub>(Te<sub>3</sub>) with temperature. The  $zT$  value of the sample is calculated by assuming the transport properties of the compact polycrystalline sample as direction independent.

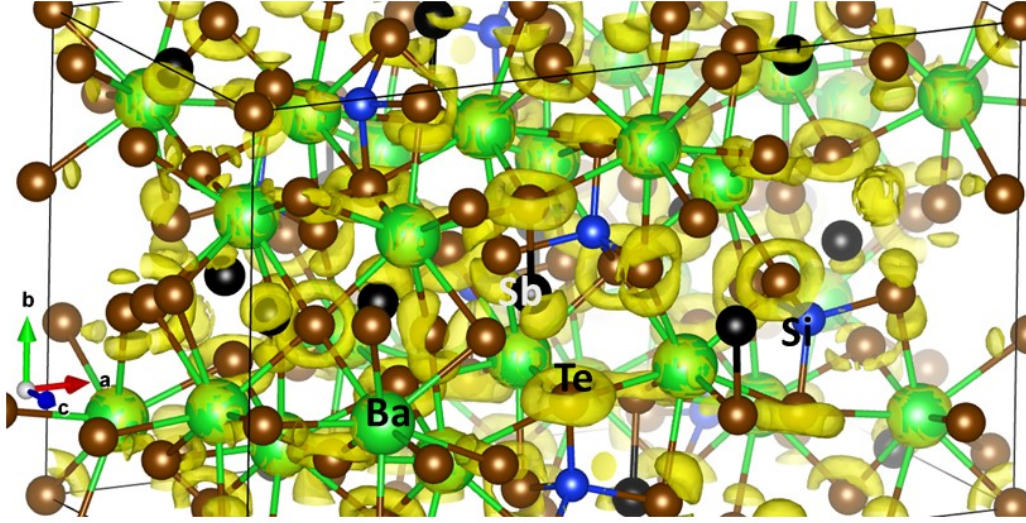

**Fig. S12:** The 3D iso-surfaces of the electron localization function (ELF) for the  $\text{Ba}_{14}\text{Si}_4\text{Sb}_8\text{Te}_{32}(\text{Te}_3)$  structure. The yellow cloud on the Te atoms indicates the density of transferred electrons. The yellow clouds on the Sb atoms show  $5s^2$  electron pair. The Ba, Si, Sb, and Te atoms are represented by green, blue, black, and brown spheres, respectively.

### S1: Optical Properties

The optical absorption coefficient ( $\alpha$ ) is obtained from the complex dielectric function  $\epsilon(\omega) = \epsilon'(\omega) + \epsilon''(\omega)$ . The imaginary part of the dielectric function  $\epsilon''(\omega)$  can be expressed as:<sup>1,2</sup>

$$\epsilon''_{ij}(\omega) = \frac{4\pi^2 e^2}{V_c} \lim_{q \rightarrow 0} \sum_{c,v,\vec{k}} 2w_{\vec{k}} \delta(\epsilon_{c\vec{k}} - \epsilon_{v\vec{k}} - \omega) \times \langle u_{c\vec{k} + \hat{e}_i q} | u_{v\vec{k}} \rangle \langle u_{c\vec{k} + \hat{e}_j q} | u_{v\vec{k}} \rangle^* \quad (\text{S1-1})$$

where; indices  $v$  indicates the valence band (VB) and the  $c$  indicates the conduction band (CB) states;  $u_{c\vec{k}}$  is the cell periodic part of the single-particle wavefunctions;  $\epsilon_{c\vec{k}}$  and  $\epsilon_{v\vec{k}}$  are CB and VB single-electron energy;  $w_{\vec{k}}$  is the weight of the k-points;  $V_c$  is the volume of the unit cell.

The real part of the dielectric function  $\epsilon'(\omega)$  can be expressed in terms of  $\epsilon''(\omega)$  via Kramers-Kronig transformation as:

$$\varepsilon'_{ij}(\omega) = 1 + \frac{2}{\pi} P \int_0^{\infty} \frac{\varepsilon''_{ij}(\omega') \omega'}{\omega'^2 - \omega^2 + i\eta} d\omega' \quad (\text{S1-2})$$

where  $\eta$  is a small complex shift and P is the principal value. The absorption coefficient  $\alpha(\omega)$  can be computed using  $\varepsilon'(\omega)$  and  $\varepsilon''(\omega)$  as:

$$\alpha(\omega) = \frac{\sqrt{2}\omega}{c} [\sqrt{\varepsilon'(\omega)^2 + \varepsilon''(\omega)^2} - \varepsilon'(\omega)]^{1/2} \quad (\text{S1-3})$$

## S2: Thermoelectric properties

The thermoelectric parameters are computed using semi-classical Boltzmann transport theory within the rigid band approach.<sup>3</sup> The carrier concentration (*p*- or *n*-type) in the system is modelled by creating shifts in the chemical potential. The electrical conductivity ( $\sigma_{ij}$ ) as a function of temperature ( $T$ ) and chemical potential ( $\mu$ ) is given as:

$$\sigma_{ij}(T; \mu) = \frac{1}{V} \int \sigma_{ij}(\epsilon) \left[ -\frac{\partial f_{\mu}(T; \mu)}{\partial \epsilon} \right] d\epsilon \quad (\text{S2-1})$$

where  $f_{\mu}(T; \mu)$  is the Fermi function,  $\epsilon$  is the energy and  $V$  is the volume.  $\sigma_{ij}$  as function of energy ( $\epsilon$ ) can be expressed as:

$$\sigma_{ij}(\epsilon) = \frac{1}{N} \sum_{n, \vec{k}} \sigma_{ij}(n, \vec{k}) \delta(\epsilon - \epsilon_{n, \vec{k}}) \quad (\text{S2-2})$$

where  $\epsilon_{n, \vec{k}}$  are the band energies and  $N$  is the number of  $\vec{k}$  points in the Brillouin zone.  $\sigma_{ij}(n, \vec{k})$  in terms of relaxation time  $\tau_{n, \vec{k}}$  and group velocity  $\vec{v}(n, \vec{k})$  is given as:

$$\sigma_{ij}(n, \vec{k}) = e^2 \tau_{n, \vec{k}} v_i(n, \vec{k}) v_j(n, \vec{k}) \quad (\text{S2-3})$$

The Seebeck coefficient tensor ( $S_{ij}$ ) as a function of temperature ( $T$ ) and chemical potential ( $\mu$ ) is given as:

$$S_{ij}(T;\mu) = \frac{1}{eTV\sigma_{ij}(T;\mu)} \int \sigma_{ij}(\epsilon)(\epsilon - \mu) \left[ -\frac{\partial f_{\mu}(T;\mu)}{\partial \epsilon} \right] d\epsilon \quad (\text{S2-4})$$

The total thermal conductivity ( $\kappa$ ) is given as  $\kappa_{\text{tot}} = \kappa_{\text{lat}} + \kappa_{\text{el}}$ , where  $\kappa_{\text{lat}}$  is the lattice (phonon) component and  $\kappa_{\text{el}}$  is the electronic component of  $\kappa_{\text{tot}}$ . The electronic part of thermal conductivity ( $\kappa_{\text{el}}$ ) and the electrical conductivity ( $\sigma$ ) are related as  $\kappa_{\text{el}} = L_0\sigma T$  (Wiedemann-Franz relation),

where  $L_0 = \frac{\pi^2}{3} \left( \frac{k_B}{e} \right)^2$  is the Lorentz number. The quantities  $\sigma$  and  $\kappa_{\text{el}}$  are computed with respect to the relaxation time  $\tau = (T_0 \times n_0^{1/3}) / (Tn^{1/3}) \times 10^{-14} \text{s}$  where  $n_0$  is the carrier concentration at

$$T_0 = 300 \text{ K}. \text{ The figure of merit } (zT) \text{ is calculated using } zT = \frac{S^2\sigma T}{(\kappa_{\text{el}} + \kappa_{\text{lat}})}.$$

**Table SII:** Fractional atomic coordinates and isotropic or equivalent isotropic displacement parameters ( $\text{\AA}^2$ ) for the  $\text{Ba}_{14}\text{Si}_4\text{Sb}_8\text{Te}_{32}(\text{Te}_3)$  structure.

| Atoms | Wyckoff Positions | Site Symmetry | $x$         | $y$         | $z$         | $U_{\text{iso}}/U_{\text{eq}}^a$ | SOF |
|-------|-------------------|---------------|-------------|-------------|-------------|----------------------------------|-----|
| Ba(1) | 4e                | 1             | 0.04343(2)  | 0.18833(5)  | 0.18477(4)  | 0.02623(13)                      | 1   |
| Ba(2) | 4e                | 1             | 0.09742(2)  | 0.81900(4)  | 0.10772(4)  | 0.02136(12)                      | 1   |
| Ba(3) | 4e                | 1             | 0.18167(2)  | 0.17380(4)  | 0.48300(4)  | 0.02183(12)                      | 1   |
| Ba(4) | 4e                | 1             | 0.32216(2)  | 0.32772(4)  | 0.26481(4)  | 0.01935(11)                      | 1   |
| Ba(5) | 4e                | 1             | 0.46798(2)  | 0.18377(4)  | 0.05881(4)  | 0.01819(11)                      | 1   |
| Ba(6) | 4e                | 1             | 0.61322(2)  | 0.17238(4)  | 0.32879(4)  | 0.01964(12)                      | 1   |
| Ba(7) | 4e                | 1             | 0.76305(2)  | 0.32426(4)  | 0.11997(4)  | 0.02005(12)                      | 1   |
| Si(1) | 4e                | 1             | 0.23117(10) | 0.6025(2)   | 0.15287(18) | 0.0205(5)                        | 1   |
| Si(2) | 4e                | 1             | 0.48135(9)  | 0.40274(19) | 0.27996(16) | 0.0150(5)                        | 1   |
| Sb(1) | 4e                | 1             | 0.05367(4)  | 0.94982(9)  | 0.39263(6)  | 0.0682(3)                        | 1   |
| Sb(2) | 4e                | 1             | 0.14703(3)  | 0.48746(6)  | 0.31953(5)  | 0.02730(15)                      | 1   |

|        |    |    |            |            |            |             |      |
|--------|----|----|------------|------------|------------|-------------|------|
| Sb(3)  | 4e | 1  | 0.27961(2) | 0.03296(5) | 0.07204(5) | 0.02389(14) | 1    |
| Sb(4)  | 4e | 1  | 0.59866(2) | 0.48145(5) | 0.14259(5) | 0.02353(14) | 1    |
| Te(1)  | 4e | 1  | 0.02298(2) | 0.43675(6) | 0.29172(5) | 0.02245(15) | 0.91 |
| Te(2)  | 4e | 1  | 0.0325(3)  | 0.3819(7)  | 0.3403(6)  | 0.0285(17)  | 0.09 |
| Te(3)  | 4e | 1  | 0.03416(2) | 0.17787(7) | 0.44546(5) | 0.03643(19) | 1    |
| Te(4)  | 4e | 1  | 0.10159(2) | 0.72154(5) | 0.35468(4) | 0.02038(13) | 1    |
| Te(5)  | 4e | 1  | 0.13133(2) | 0.55879(5) | 0.10113(4) | 0.02545(14) | 1    |
| Te(6)  | 4e | 1  | 0.13902(2) | 0.00681(5) | 0.28984(4) | 0.02057(13) | 1    |
| Te(7)  | 4e | 1  | 0.16376(2) | 0.06408(5) | 0.03331(4) | 0.02077(13) | 1    |
| Te(8)  | 4e | 1  | 0.17873(2) | 0.29443(5) | 0.24775(4) | 0.01854(12) | 1    |
| Te(9)  | 4e | 1  | 0.24942(2) | 0.78443(5) | 0.12369(4) | 0.01919(12) | 1    |
| Te(10) | 4e | 1  | 0.26354(2) | 0.56712(5) | 0.33512(4) | 0.01839(12) | 1    |
| Te(11) | 4e | 1  | 0.29002(2) | 0.05889(5) | 0.28283(4) | 0.01949(13) | 1    |
| Te(12) | 4e | 1  | 0.29250(2) | 0.49647(5) | 0.05945(4) | 0.02134(13) | 1    |
| Te(13) | 4e | 1  | 0.32041(2) | 0.22014(5) | 0.02389(4) | 0.01839(12) | 1    |
| Te(14) | 4e | 1  | 0.45953(2) | 0.44316(5) | 0.10223(4) | 0.02253(13) | 1    |
| Te(15) | 4e | 1  | 0.46604(2) | 0.22048(4) | 0.31459(4) | 0.01694(12) | 1    |
| Te(16) | 4e | 1  | 0.57652(2) | 0.00507(4) | 0.11982(4) | 0.01680(12) | 1    |
| Te(17) | 4e | 1  | 0.58393(2) | 0.44434(5) | 0.34105(4) | 0.01814(12) | 1    |
| Te(18) | 4e | 1  | 0.61415(2) | 0.28283(5) | 0.09010(4) | 0.01804(12) | 1    |
| Te(19) | 2a | -1 | 0.000000   | 0.000000   | 0.000000   | 0.0349(2)   | 1    |

<sup>a</sup> $U_{\text{iso}}/U_{\text{eq}}$  is one-third trace value of the orthogonalized  $U_{ij}$  tensor.

**Table SI2:** The atomic displacement parameters ( $\text{\AA}^2$ ) for the  $\text{Ba}_{14}\text{Si}_4\text{Sb}_8\text{Te}_{32}(\text{Te}_3)$  structure.

| Atom | $U^{11}$   | $U^{22}$   | $U^{\beta 3}$ | $U^{12}$    | $U^{13}$     | $U^{23}$    |
|------|------------|------------|---------------|-------------|--------------|-------------|
| Ba1  | 0.0215(3)  | 0.0259(3)  | 0.0297(3)     | -0.0004(2)  | -0.0023(2)   | 0.0003(2)   |
| Ba2  | 0.0229(2)  | 0.0219(3)  | 0.0185(3)     | 0.0050(2)   | -0.00036(19) | -0.0005(2)  |
| Ba3  | 0.0219(2)  | 0.0199(3)  | 0.0222(3)     | -0.0011(2)  | -0.0023(2)   | -0.0007(2)  |
| Ba4  | 0.0198(2)  | 0.0188(3)  | 0.0186(3)     | 0.0004(2)   | -0.00071(18) | -0.0009(2)  |
| Ba5  | 0.0206(2)  | 0.0174(3)  | 0.0159(2)     | 0.0012(2)   | 0.00010(18)  | -0.0010(2)  |
| Ba6  | 0.0208(2)  | 0.0191(3)  | 0.0180(3)     | 0.0007(2)   | -0.00135(19) | 0.0010(2)   |
| Ba7  | 0.0215(2)  | 0.0179(3)  | 0.0197(3)     | 0.0002(2)   | -0.00118(19) | 0.0005(2)   |
| Si1  | 0.0242(12) | 0.0192(14) | 0.0185(12)    | -0.0009(10) | 0.0038(9)    | -0.0003(10) |
| Si2  | 0.0153(10) | 0.0133(13) | 0.0162(11)    | 0.0011(9)   | 0.0009(8)    | -0.0019(9)  |
| Sb1  | 0.0495(5)  | 0.1205(10) | 0.0336(5)     | -0.0442(6)  | 0.0015(4)    | 0.0158(5)   |
| Sb2  | 0.0277(3)  | 0.0319(4)  | 0.0218(3)     | -0.0058(3)  | 0.0013(2)    | 0.0002(3)   |
| Sb3  | 0.0245(3)  | 0.0210(4)  | 0.0250(3)     | 0.0004(2)   | -0.0007(2)   | 0.0015(3)   |
| Sb4  | 0.0296(3)  | 0.0174(3)  | 0.0229(3)     | 0.0022(3)   | 0.0011(2)    | 0.0009(3)   |
| Te1  | 0.0155(3)  | 0.0274(4)  | 0.0237(4)     | -0.0011(3)  | -0.0001(2)   | -0.0019(3)  |
| Te2  | 0.020(3)   | 0.039(5)   | 0.028(4)      | -0.007(3)   | 0.009(3)     | -0.018(4)   |
| Te3  | 0.0218(3)  | 0.0580(6)  | 0.0289(4)     | 0.0049(3)   | 0.0016(2)    | -0.0086(3)  |
| Te4  | 0.0205(3)  | 0.0226(3)  | 0.0181(3)     | -0.0036(2)  | 0.0027(2)    | 0.0021(2)   |
| Te5  | 0.0272(3)  | 0.0236(4)  | 0.0227(3)     | 0.0021(3)   | -0.0072(2)   | -0.0016(3)  |
| Te6  | 0.0252(3)  | 0.0157(3)  | 0.0209(3)     | 0.0010(2)   | 0.0034(2)    | -0.0005(2)  |
| Te7  | 0.0226(3)  | 0.0221(3)  | 0.0175(3)     | -0.0011(2)  | 0.0023(2)    | 0.0009(2)   |
| Te8  | 0.0185(2)  | 0.0168(3)  | 0.0199(3)     | -0.0012(2)  | 0.0012(2)    | -0.0005(2)  |
| Te9  | 0.0240(3)  | 0.0149(3)  | 0.0190(3)     | 0.0011(2)   | 0.0042(2)    | 0.0007(2)   |
| Te10 | 0.0203(3)  | 0.0170(3)  | 0.0173(3)     | -0.0018(2)  | 0.0003(2)    | 0.0000(2)   |

|      |           |           |           |            |             |            |
|------|-----------|-----------|-----------|------------|-------------|------------|
| Te11 | 0.0205(3) | 0.0194(3) | 0.0187(3) | 0.0016(2)  | 0.0033(2)   | 0.0023(2)  |
| Te12 | 0.0266(3) | 0.0158(3) | 0.0215(3) | -0.0009(2) | 0.0029(2)   | -0.0004(2) |
| Te13 | 0.0191(3) | 0.0180(3) | 0.0180(3) | 0.0010(2)  | 0.0025(2)   | -0.0001(2) |
| Te14 | 0.0312(3) | 0.0182(3) | 0.0170(3) | 0.0052(2)  | -0.0013(2)  | 0.0008(2)  |
| Te15 | 0.0206(3) | 0.0129(3) | 0.0175(3) | -0.0005(2) | 0.0032(2)   | -0.0004(2) |
| Te16 | 0.0175(2) | 0.0140(3) | 0.0194(3) | -0.0005(2) | 0.00401(19) | 0.0001(2)  |
| Te17 | 0.0161(2) | 0.0197(3) | 0.0185(3) | -0.0015(2) | 0.00173(19) | -0.0027(2) |
| Te18 | 0.0210(3) | 0.0158(3) | 0.0176(3) | -0.0007(2) | 0.0034(2)   | 0.0002(2)  |
| Te19 | 0.0192(4) | 0.0256(6) | 0.0572(6) | 0.0070(4)  | -0.0042(4)  | -0.0121(5) |

**Table S13:** The geometric parameters (Å) for the Ba<sub>14</sub>Si<sub>4</sub>Sb<sub>8</sub>Te<sub>32</sub>(Te<sub>3</sub>) structure.

|                        |             |                         |            |
|------------------------|-------------|-------------------------|------------|
| Ba1—Te2                | 3.380 (7)   | Ba5—Ba6                 | 4.7372 (8) |
| Ba1—Te4 <sup>i</sup>   | 3.5098 (8)  | Ba6—Te12 <sup>ix</sup>  | 3.4853 (8) |
| Ba1—Te6                | 3.5253 (9)  | Ba6—Te18                | 3.5730 (8) |
| Ba1—Te8                | 3.5693 (8)  | Ba6—Te15                | 3.6020 (8) |
| Ba1—Te3                | 3.5885 (10) | Ba6—Te18 <sup>vii</sup> | 3.6044 (8) |
| Ba1—Te19               | 3.6173 (7)  | Ba6—Te9 <sup>ix</sup>   | 3.6279 (8) |
| Ba1—Te1                | 3.6913 (10) | Ba6—Te16                | 3.6367 (8) |
| Ba1—Te3 <sup>ii</sup>  | 3.6984 (10) | Ba6—Te17                | 3.7186 (9) |
| Ba1—Te1 <sup>i</sup>   | 3.7656 (10) | Ba6—Te14 <sup>ix</sup>  | 3.7220 (9) |
| Ba2—Te2 <sup>iii</sup> | 3.422 (6)   | Ba7—Te6 <sup>vi</sup>   | 3.5113 (8) |
| Ba2—Te4 <sup>iv</sup>  | 3.5019 (8)  | Ba7—Te4 <sup>ix</sup>   | 3.5293 (8) |
| Ba2—Te19 <sup>v</sup>  | 3.5589 (6)  | Ba7—Te12 <sup>x</sup>   | 3.5579 (8) |
| Ba2—Te6 <sup>v</sup>   | 3.5803 (8)  | Ba7—Te10 <sup>ix</sup>  | 3.5710 (9) |

|                         |             |                        |             |
|-------------------------|-------------|------------------------|-------------|
| Ba2—Te5                 | 3.5842 (10) | Ba7—Te9 <sup>ix</sup>  | 3.5826 (8)  |
| Ba2—Te4                 | 3.5951 (8)  | Ba7—Te9 <sup>x</sup>   | 3.5977 (8)  |
| Ba2—Te9                 | 3.6879 (8)  | Ba7—Te18               | 3.6176 (8)  |
| Ba2—Te3 <sup>iii</sup>  | 3.6926 (9)  | Ba7—Te11 <sup>vi</sup> | 3.7057 (9)  |
| Ba2—Te1 <sup>iii</sup>  | 3.7330 (9)  | Si1—Te5                | 2.496 (2)   |
| Ba2—Te7 <sup>v</sup>    | 3.8491 (9)  | Si1—Te9                | 2.517 (3)   |
| Ba2—Ba7 <sup>vi</sup>   | 4.6701 (8)  | Si1—Te12               | 2.519 (3)   |
| Ba3—Te6                 | 3.5007 (8)  | Si1—Te10               | 2.544 (2)   |
| Ba3—Te3                 | 3.5411 (8)  | Si2—Te14               | 2.466 (2)   |
| Ba3—Te12 <sup>vii</sup> | 3.5693 (8)  | Si2—Te16 <sup>vi</sup> | 2.493 (2)   |
| Ba3—Te8                 | 3.5790 (9)  | Si2—Te15               | 2.523 (3)   |
| Ba3—Te7 <sup>vii</sup>  | 3.6137 (10) | Si2—Te17               | 2.573 (2)   |
| Ba3—Te13 <sup>vii</sup> | 3.6219 (8)  | Sb1—Te6 <sup>v</sup>   | 2.7549 (10) |
| Ba3—Te8 <sup>vii</sup>  | 3.6393 (9)  | Sb1—Te1 <sup>iii</sup> | 2.9201 (11) |
| Ba3—Te5 <sup>vii</sup>  | 3.7814 (9)  | Sb1—Te3 <sup>v</sup>   | 3.1873 (16) |
| Ba3—Ba4 <sup>vii</sup>  | 4.7747 (8)  | Sb1—Te5 <sup>xi</sup>  | 3.1901 (10) |
| Ba4—Te8                 | 3.4792 (8)  | Sb2—Te8                | 2.9030 (10) |
| Ba4—Te13                | 3.5772 (8)  | Sb2—Te7 <sup>vii</sup> | 2.9652 (9)  |
| Ba4—Te13 <sup>vii</sup> | 3.5904 (8)  | Sb2—Te10               | 2.9978 (8)  |
| Ba4—Te12                | 3.5917 (8)  | Sb2—Te1                | 3.0538 (9)  |
| Ba4—Te16 <sup>vi</sup>  | 3.6191 (8)  | Sb2—Te5                | 3.0973 (9)  |
| Ba4—Te10                | 3.6843 (9)  | Sb2—Te2                | 3.159 (7)   |
| Ba4—Te11                | 3.6984 (9)  | Sb3—Te13               | 2.8043 (9)  |
| Ba4—Te15                | 3.7462 (8)  | Sb3—Te7                | 2.8159 (8)  |



|                            |              |                                            |              |
|----------------------------|--------------|--------------------------------------------|--------------|
| Ba5—Te15                   | 3.5229 (8)   | Sb3—Te11                                   | 2.8678 (9)   |
| Ba5—Te14                   | 3.5342 (9)   | Sb4—Te18                                   | 2.7925 (9)   |
| Ba5—Te15 <sup>ii</sup>     | 3.5578 (8)   | Sb4—Te17                                   | 2.8163 (9)   |
| Ba5—Te16                   | 3.5697 (8)   | Sb4—Te11 <sup>vi</sup>                     | 2.9397 (8)   |
| Ba5—Te16 <sup>viii</sup>   | 3.5732 (8)   | Te1—Te2                                    | 0.995 (9)    |
| Ba5—Te13                   | 3.5752 (8)   | Te1—Te19 <sup>iii</sup>                    | 3.0804 (7)   |
| Ba5—Te18                   | 3.7511 (8)   | Te2—Te19 <sup>iii</sup>                    | 2.882 (7)    |
| Ba5—Te17 <sup>ix</sup>     | 3.7654 (9)   | Te2—Te3                                    | 3.082 (10)   |
|                            |              |                                            |              |
| Te2—Ba1—Te4 <sup>i</sup>   | 80.68 (11)   | Te6 <sup>vi</sup> —Ba7—Te11 <sup>vi</sup>  | 62.300 (17)  |
| Te2—Ba1—Te6                | 112.14 (15)  | Te4 <sup>ix</sup> —Ba7—Te11 <sup>vi</sup>  | 131.13 (2)   |
| Te4 <sup>i</sup> —Ba1—Te6  | 137.63 (2)   | Te12 <sup>x</sup> —Ba7—Te11 <sup>vi</sup>  | 63.614 (17)  |
| Te2—Ba1—Te8                | 71.97 (11)   | Te10 <sup>ix</sup> —Ba7—Te11 <sup>vi</sup> | 132.64 (2)   |
| Te4 <sup>i</sup> —Ba1—Te8  | 148.66 (2)   | Te9 <sup>ix</sup> —Ba7—Te11 <sup>vi</sup>  | 72.536 (17)  |
| Te6—Ba1—Te8                | 69.216 (18)  | Te9 <sup>x</sup> —Ba7—Te11 <sup>vi</sup>   | 132.997 (19) |
| Te2—Ba1—Te3                | 52.40 (16)   | Te18—Ba7—Te11 <sup>vi</sup>                | 77.402 (17)  |
| Te4 <sup>i</sup> —Ba1—Te3  | 87.840 (19)  | Te6 <sup>vi</sup> —Ba7—Ba2 <sup>ix</sup>   | 49.451 (14)  |
| Te6—Ba1—Te3                | 72.337 (19)  | Te4 <sup>ix</sup> —Ba7—Ba2 <sup>ix</sup>   | 49.653 (14)  |
| Te8—Ba1—Te3                | 87.423 (19)  | Te12 <sup>x</sup> —Ba7—Ba2 <sup>ix</sup>   | 136.216 (19) |
| Te2—Ba1—Te19               | 158.52 (12)  | Te10 <sup>ix</sup> —Ba7—Ba2 <sup>ix</sup>  | 88.711 (15)  |
| Te4 <sup>i</sup> —Ba1—Te19 | 77.885 (15)  | Te9 <sup>ix</sup> —Ba7—Ba2 <sup>ix</sup>   | 51.031 (14)  |
| Te6—Ba1—Te19               | 85.143 (18)  | Te9 <sup>x</sup> —Ba7—Ba2 <sup>ix</sup>    | 133.484 (18) |
| Te8—Ba1—Te19               | 128.076 (19) | Te18—Ba7—Ba2 <sup>ix</sup>                 | 133.742 (18) |
| Te3—Ba1—Te19               | 127.56 (2)   | Te11 <sup>vi</sup> —Ba7—Ba2 <sup>ix</sup>  | 88.746 (15)  |

|                                           |              |                                           |             |
|-------------------------------------------|--------------|-------------------------------------------|-------------|
| Te2—Ba1—Te1                               | 15.37 (15)   | Te5—Si1—Te9                               | 111.51 (10) |
| Te4 <sup>i</sup> —Ba1—Te1                 | 76.216 (18)  | Te5—Si1—Te12                              | 109.86 (10) |
| Te6—Ba1—Te1                               | 125.24 (2)   | Te9—Si1—Te12                              | 109.76 (9)  |
| Te8—Ba1—Te1                               | 73.371 (18)  | Te5—Si1—Te10                              | 113.07 (9)  |
| Te3—Ba1—Te1                               | 67.40 (2)    | Te9—Si1—Te10                              | 107.25 (9)  |
| Te19—Ba1—Te1                              | 149.400 (19) | Te12—Si1—Te10                             | 105.17 (9)  |
| Te2—Ba1—Te3 <sup>ii</sup>                 | 100.35 (16)  | Te14—Si2—Te16 <sup>vi</sup>               | 110.72 (9)  |
| Te4 <sup>i</sup> —Ba1—Te3 <sup>ii</sup>   | 82.094 (18)  | Te14—Si2—Te15                             | 112.21 (9)  |
| Te6—Ba1—Te3 <sup>ii</sup>                 | 130.58 (2)   | Te16 <sup>vi</sup> —Si2—Te15              | 108.79 (9)  |
| Te8—Ba1—Te3 <sup>ii</sup>                 | 87.944 (19)  | Te14—Si2—Te17                             | 109.89 (9)  |
| Te3—Ba1—Te3 <sup>ii</sup>                 | 152.32 (2)   | Te16 <sup>vi</sup> —Si2—Te17              | 107.06 (9)  |
| Te19—Ba1—Te3 <sup>ii</sup>                | 75.382 (19)  | Te15—Si2—Te17                             | 107.99 (8)  |
| Te1—Ba1—Te3 <sup>ii</sup>                 | 85.14 (2)    | Te6 <sup>v</sup> —Sb1—Te1 <sup>iii</sup>  | 90.81 (3)   |
| Te2—Ba1—Te1 <sup>i</sup>                  | 124.25 (13)  | Te6 <sup>v</sup> —Sb1—Te3 <sup>v</sup>    | 89.60 (3)   |
| Te4 <sup>i</sup> —Ba1—Te1 <sup>i</sup>    | 72.314 (18)  | Te1 <sup>iii</sup> —Sb1—Te3 <sup>v</sup>  | 98.91 (4)   |
| Te6—Ba1—Te1 <sup>i</sup>                  | 67.255 (19)  | Te6 <sup>v</sup> —Sb1—Te5 <sup>xi</sup>   | 93.94 (3)   |
| Te8—Ba1—Te1 <sup>i</sup>                  | 136.45 (2)   | Te1 <sup>iii</sup> —Sb1—Te5 <sup>xi</sup> | 173.55 (4)  |
| Te3—Ba1—Te1 <sup>i</sup>                  | 78.29 (2)    | Te3 <sup>v</sup> —Sb1—Te5 <sup>xi</sup>   | 85.49 (3)   |
| Te19—Ba1—Te1 <sup>i</sup>                 | 49.272 (14)  | Te8—Sb2—Te7 <sup>vii</sup>                | 96.64 (3)   |
| Te1—Ba1—Te1 <sup>i</sup>                  | 133.744 (17) | Te8—Sb2—Te10                              | 92.97 (2)   |
| Te3 <sup>ii</sup> —Ba1—Te1 <sup>i</sup>   | 122.15 (2)   | Te7 <sup>vii</sup> —Sb2—Te10              | 90.56 (2)   |
| Te2 <sup>iii</sup> —Ba2—Te4 <sup>iv</sup> | 112.95 (13)  | Te8—Sb2—Te1                               | 93.46 (3)   |
| Te2 <sup>iii</sup> —Ba2—Te19 <sup>v</sup> | 48.71 (12)   | Te7 <sup>vii</sup> —Sb2—Te1               | 94.17 (3)   |
| Te4 <sup>iv</sup> —Ba2—Te19 <sup>v</sup>  | 78.768 (15)  | Te10—Sb2—Te1                              | 171.52 (3)  |

|                                            |              |                                           |             |
|--------------------------------------------|--------------|-------------------------------------------|-------------|
| Te2 <sup>iii</sup> —Ba2—Te6 <sup>v</sup>   | 82.26 (16)   | Te8—Sb2—Te5                               | 87.45 (2)   |
| Te4 <sup>iv</sup> —Ba2—Te6 <sup>v</sup>    | 138.38 (2)   | Te7 <sup>vii</sup> —Sb2—Te5               | 175.45 (3)  |
| Te19 <sup>v</sup> —Ba2—Te6 <sup>v</sup>    | 85.204 (17)  | Te10—Sb2—Te5                              | 87.22 (2)   |
| Te2 <sup>iii</sup> —Ba2—Te5                | 117.69 (15)  | Te1—Sb2—Te5                               | 87.56 (2)   |
| Te4 <sup>iv</sup> —Ba2—Te5                 | 77.747 (18)  | Te8—Sb2—Te2                               | 84.65 (15)  |
| Te19 <sup>v</sup> —Ba2—Te5                 | 142.504 (18) | Te7 <sup>vii</sup> —Sb2—Te2               | 79.28 (15)  |
| Te6 <sup>v</sup> —Ba2—Te5                  | 131.01 (2)   | Te10—Sb2—Te2                              | 169.20 (17) |
| Te2 <sup>iii</sup> —Ba2—Te4                | 78.91 (12)   | Te1—Sb2—Te2                               | 18.33 (16)  |
| Te4 <sup>iv</sup> —Ba2—Te4                 | 149.613 (19) | Te5—Sb2—Te2                               | 103.16 (15) |
| Te19 <sup>v</sup> —Ba2—Te4                 | 124.512 (18) | Te13—Sb3—Te7                              | 101.39 (3)  |
| Te6 <sup>v</sup> —Ba2—Te4                  | 68.744 (18)  | Te13—Sb3—Te11                             | 98.00 (3)   |
| Te5—Ba2—Te4                                | 72.095 (18)  | Te7—Sb3—Te11                              | 96.97 (3)   |
| Te2 <sup>iii</sup> —Ba2—Te9                | 163.17 (15)  | Te18—Sb4—Te17                             | 96.66 (3)   |
| Te4 <sup>iv</sup> —Ba2—Te9                 | 83.016 (17)  | Te18—Sb4—Te11 <sup>vi</sup>               | 106.02 (3)  |
| Te19 <sup>v</sup> —Ba2—Te9                 | 135.34 (2)   | Te17—Sb4—Te11 <sup>vi</sup>               | 87.66 (2)   |
| Te6 <sup>v</sup> —Ba2—Te9                  | 82.025 (17)  | Te2—Te1—Sb1 <sup>i</sup>                  | 132.9 (4)   |
| Te5—Ba2—Te9                                | 69.459 (16)  | Te2—Te1—Sb2                               | 86.8 (4)    |
| Te4—Ba2—Te9                                | 89.801 (17)  | Sb1 <sup>i</sup> —Te1—Sb2                 | 126.50 (3)  |
| Te2 <sup>iii</sup> —Ba2—Te3 <sup>iii</sup> | 51.17 (16)   | Te2—Te1—Te19 <sup>iii</sup>               | 69.2 (4)    |
| Te4 <sup>iv</sup> —Ba2—Te3 <sup>iii</sup>  | 82.283 (18)  | Sb1 <sup>i</sup> —Te1—Te19 <sup>iii</sup> | 127.02 (3)  |
| Te19 <sup>v</sup> —Ba2—Te3 <sup>iii</sup>  | 76.152 (18)  | Sb2—Te1—Te19 <sup>iii</sup>               | 96.94 (2)   |
| Te6 <sup>v</sup> —Ba2—Te3 <sup>iii</sup>   | 130.60 (2)   | Te2—Te1—Ba1                               | 64.3 (4)    |
| Te5—Ba2—Te3 <sup>iii</sup>                 | 72.07 (2)    | Sb1 <sup>i</sup> —Te1—Ba1                 | 79.54 (3)   |
| Te4—Ba2—Te3 <sup>iii</sup>                 | 85.001 (19)  | Sb2—Te1—Ba1                               | 93.87 (2)   |

|                                            |              |                                             |              |
|--------------------------------------------|--------------|---------------------------------------------|--------------|
| Te9—Ba2—Te3 <sup>iii</sup>                 | 140.88 (2)   | Te19 <sup>iii</sup> —Te1—Ba1                | 131.39 (3)   |
| Te2 <sup>iii</sup> —Ba2—Te1 <sup>iii</sup> | 15.19 (16)   | Te2—Te1—Ba2 <sup>i</sup>                    | 64.4 (4)     |
| Te4 <sup>iv</sup> —Ba2—Te1 <sup>iii</sup>  | 123.58 (2)   | Sb1 <sup>i</sup> —Te1—Ba2 <sup>i</sup>      | 84.41 (3)    |
| Te19 <sup>v</sup> —Ba2—Te1 <sup>iii</sup>  | 49.909 (14)  | Sb2—Te1—Ba2 <sup>i</sup>                    | 148.47 (3)   |
| Te6 <sup>v</sup> —Ba2—Te1 <sup>iii</sup>   | 67.079 (18)  | Te19 <sup>iii</sup> —Te1—Ba2 <sup>i</sup>   | 62.111 (15)  |
| Te5—Ba2—Te1 <sup>iii</sup>                 | 127.79 (2)   | Ba1—Te1—Ba2 <sup>i</sup>                    | 85.22 (2)    |
| Te4—Ba2—Te1 <sup>iii</sup>                 | 74.686 (18)  | Te2—Te1—Ba1 <sup>iii</sup>                  | 131.9 (4)    |
| Te9—Ba2—Te1 <sup>iii</sup>                 | 148.67 (2)   | Sb1 <sup>i</sup> —Te1—Ba1 <sup>iii</sup>    | 77.86 (3)    |
| Te3 <sup>iii</sup> —Ba2—Te1 <sup>iii</sup> | 65.92 (2)    | Sb2—Te1—Ba1 <sup>iii</sup>                  | 102.41 (3)   |
| Te2 <sup>iii</sup> —Ba2—Te7 <sup>v</sup>   | 105.80 (14)  | Te19 <sup>iii</sup> —Te1—Ba1 <sup>iii</sup> | 62.857 (16)  |
| Te4 <sup>iv</sup> —Ba2—Te7 <sup>v</sup>    | 78.770 (18)  | Ba1—Te1—Ba1 <sup>iii</sup>                  | 157.120 (19) |
| Te19 <sup>v</sup> —Ba2—Te7 <sup>v</sup>    | 65.664 (15)  | Ba2 <sup>i</sup> —Te1—Ba1 <sup>iii</sup>    | 89.04 (2)    |
| Te6 <sup>v</sup> —Ba2—Te7 <sup>v</sup>     | 59.640 (17)  | Te1—Te2—Te19 <sup>iii</sup>                 | 92.0 (5)     |
| Te5—Ba2—Te7 <sup>v</sup>                   | 135.83 (2)   | Te1—Te2—Te3                                 | 161.9 (5)    |
| Te4—Ba2—Te7 <sup>v</sup>                   | 126.53 (2)   | Te19 <sup>iii</sup> —Te2—Te3                | 97.1 (2)     |
| Te9—Ba2—Te7 <sup>v</sup>                   | 70.972 (17)  | Te1—Te2—Sb2                                 | 74.8 (4)     |
| Te3 <sup>iii</sup> —Ba2—Te7 <sup>v</sup>   | 139.87 (2)   | Te19 <sup>iii</sup> —Te2—Sb2                | 98.9 (2)     |
| Te1 <sup>iii</sup> —Ba2—Te7 <sup>v</sup>   | 96.34 (2)    | Te3—Te2—Sb2                                 | 118.8 (2)    |
| Te2 <sup>iii</sup> —Ba2—Ba7 <sup>vi</sup>  | 114.84 (14)  | Te1—Te2—Ba1                                 | 100.4 (4)    |
| Te4 <sup>iv</sup> —Ba2—Ba7 <sup>vi</sup>   | 132.063 (18) | Te19 <sup>iii</sup> —Te2—Ba1                | 161.0 (3)    |
| Te19 <sup>v</sup> —Ba2—Ba7 <sup>vi</sup>   | 133.321 (17) | Te3—Te2—Ba1                                 | 67.28 (17)   |
| Te6 <sup>v</sup> —Ba2—Ba7 <sup>vi</sup>    | 48.177 (14)  | Sb2—Te2—Ba1                                 | 98.26 (17)   |
| Te5—Ba2—Ba7 <sup>vi</sup>                  | 83.721 (15)  | Te1—Te2—Ba2 <sup>i</sup>                    | 100.4 (4)    |
| Te4—Ba2—Ba7 <sup>vi</sup>                  | 48.434 (13)  | Te19 <sup>iii</sup> —Te2—Ba2 <sup>i</sup>   | 68.12 (13)   |

|                                              |              |                                            |             |
|----------------------------------------------|--------------|--------------------------------------------|-------------|
| Te9—Ba2—Ba7 <sup>vi</sup>                    | 49.051 (13)  | Te3—Te2—Ba2 <sup>i</sup>                   | 68.95 (16)  |
| Te3 <sup>iii</sup> —Ba2—Ba7 <sup>vi</sup>    | 132.615 (19) | Sb2—Te2—Ba2 <sup>i</sup>                   | 166.3 (3)   |
| Te1 <sup>iii</sup> —Ba2—Ba7 <sup>vi</sup>    | 102.728 (18) | Ba1—Te2—Ba2 <sup>i</sup>                   | 95.27 (18)  |
| Te7 <sup>v</sup> —Ba2—Ba7 <sup>vi</sup>      | 85.002 (15)  | Te2—Te3—Sb1 <sup>xii</sup>                 | 137.55 (13) |
| Te6—Ba3—Te3                                  | 73.198 (18)  | Te2—Te3—Ba3                                | 91.76 (12)  |
| Te6—Ba3—Te12 <sup>vii</sup>                  | 86.88 (2)    | Sb1 <sup>xii</sup> —Te3—Ba3                | 80.83 (2)   |
| Te3—Ba3—Te12 <sup>vii</sup>                  | 139.18 (2)   | Te2—Te3—Ba1                                | 60.33 (13)  |
| Te6—Ba3—Te8                                  | 69.375 (19)  | Sb1 <sup>xii</sup> —Te3—Ba1                | 77.49 (2)   |
| Te3—Ba3—Te8                                  | 88.002 (19)  | Ba3—Te3—Ba1                                | 87.004 (19) |
| Te12 <sup>vii</sup> —Ba3—Te8                 | 118.25 (2)   | Te2—Te3—Ba2 <sup>i</sup>                   | 59.88 (12)  |
| Te6—Ba3—Te7 <sup>vii</sup>                   | 137.06 (2)   | Sb1 <sup>xii</sup> —Te3—Ba2 <sup>i</sup>   | 126.61 (3)  |
| Te3—Ba3—Te7 <sup>vii</sup>                   | 82.41 (2)    | Ba3—Te3—Ba2 <sup>i</sup>                   | 149.75 (3)  |
| Te12 <sup>vii</sup> —Ba3—Te7 <sup>vii</sup>  | 132.07 (2)   | Ba1—Te3—Ba2 <sup>i</sup>                   | 87.30 (2)   |
| Te8—Ba3—Te7 <sup>vii</sup>                   | 75.082 (18)  | Te2—Te3—Ba1 <sup>vii</sup>                 | 88.56 (13)  |
| Te6—Ba3—Te13 <sup>vii</sup>                  | 122.70 (2)   | Sb1 <sup>xii</sup> —Te3—Ba1 <sup>vii</sup> | 132.04 (3)  |
| Te3—Ba3—Te13 <sup>vii</sup>                  | 155.99 (3)   | Ba3—Te3—Ba1 <sup>vii</sup>                 | 86.520 (19) |
| Te12 <sup>vii</sup> —Ba3—Te13 <sup>vii</sup> | 63.877 (18)  | Ba1—Te3—Ba1 <sup>vii</sup>                 | 147.97 (3)  |
| Te8—Ba3—Te13 <sup>vii</sup>                  | 82.376 (17)  | Ba2 <sup>i</sup> —Te3—Ba1 <sup>vii</sup>   | 82.743 (19) |
| Te7 <sup>vii</sup> —Ba3—Te13 <sup>vii</sup>  | 73.884 (17)  | Ba2 <sup>xi</sup> —Te4—Ba1 <sup>iii</sup>  | 88.319 (18) |
| Te6—Ba3—Te8 <sup>vii</sup>                   | 140.86 (2)   | Ba2 <sup>xi</sup> —Te4—Ba7 <sup>vi</sup>   | 96.493 (18) |
| Te3—Ba3—Te8 <sup>vii</sup>                   | 89.305 (19)  | Ba1 <sup>iii</sup> —Te4—Ba7 <sup>vi</sup>  | 164.12 (2)  |
| Te12 <sup>vii</sup> —Ba3—Te8 <sup>vii</sup>  | 84.244 (17)  | Ba2 <sup>xi</sup> —Te4—Ba2                 | 167.21 (2)  |
| Te8—Ba3—Te8 <sup>vii</sup>                   | 146.374 (19) | Ba1 <sup>iii</sup> —Te4—Ba2                | 90.045 (18) |
| Te7 <sup>vii</sup> —Ba3—Te8 <sup>vii</sup>   | 71.338 (17)  | Ba7 <sup>vi</sup> —Te4—Ba2                 | 81.911 (17) |

|                                             |              |                                            |             |
|---------------------------------------------|--------------|--------------------------------------------|-------------|
| Te13 <sup>vii</sup> —Ba3—Te8 <sup>vii</sup> | 86.724 (17)  | Si1—Te5—Sb2                                | 79.15 (6)   |
| Te6—Ba3—Te5 <sup>vii</sup>                  | 73.364 (19)  | Si1—Te5—Sb1 <sup>iv</sup>                  | 133.87 (6)  |
| Te3—Ba3—Te5 <sup>vii</sup>                  | 72.393 (19)  | Sb2—Te5—Sb1 <sup>iv</sup>                  | 145.57 (3)  |
| Te12 <sup>vii</sup> —Ba3—Te5 <sup>vii</sup> | 67.823 (18)  | Si1—Te5—Ba2                                | 88.93 (7)   |
| Te8—Ba3—Te5 <sup>vii</sup>                  | 141.57 (2)   | Sb2—Te5—Ba2                                | 105.96 (2)  |
| Te7 <sup>vii</sup> —Ba3—Te5 <sup>vii</sup>  | 131.75 (2)   | Sb1 <sup>iv</sup> —Te5—Ba2                 | 87.00 (3)   |
| Te13 <sup>vii</sup> —Ba3—Te5 <sup>vii</sup> | 127.088 (19) | Si1—Te5—Ba3 <sup>ii</sup>                  | 87.59 (6)   |
| Te8 <sup>vii</sup> —Ba3—Te5 <sup>vii</sup>  | 67.973 (17)  | Sb2—Te5—Ba3 <sup>ii</sup>                  | 98.57 (2)   |
| Te6—Ba3—Ba4 <sup>vii</sup>                  | 135.041 (19) | Sb1 <sup>iv</sup> —Te5—Ba3 <sup>ii</sup>   | 77.12 (2)   |
| Te3—Ba3—Ba4 <sup>vii</sup>                  | 135.452 (19) | Ba2—Te5—Ba3 <sup>ii</sup>                  | 154.09 (2)  |
| Te12 <sup>vii</sup> —Ba3—Ba4 <sup>vii</sup> | 48.383 (14)  | Sb1 <sup>xii</sup> —Te6—Ba3                | 87.79 (3)   |
| Te8—Ba3—Ba4 <sup>vii</sup>                  | 130.350 (17) | Sb1 <sup>xii</sup> —Te6—Ba7 <sup>ix</sup>  | 98.47 (3)   |
| Te7 <sup>vii</sup> —Ba3—Ba4 <sup>vii</sup>  | 86.711 (15)  | Ba3—Te6—Ba7 <sup>ix</sup>                  | 93.704 (19) |
| Te13 <sup>vii</sup> —Ba3—Ba4 <sup>vii</sup> | 48.053 (13)  | Sb1 <sup>xii</sup> —Te6—Ba1                | 84.28 (3)   |
| Te8 <sup>vii</sup> —Ba3—Ba4 <sup>vii</sup>  | 46.467 (13)  | Ba3—Te6—Ba1                                | 88.62 (2)   |
| Te5 <sup>vii</sup> —Ba3—Ba4 <sup>vii</sup>  | 83.714 (15)  | Ba7 <sup>ix</sup> —Te6—Ba1                 | 176.46 (2)  |
| Te8—Ba4—Te13                                | 89.895 (17)  | Sb1 <sup>xii</sup> —Te6—Ba2 <sup>xii</sup> | 89.79 (3)   |
| Te8—Ba4—Te13 <sup>vii</sup>                 | 84.238 (17)  | Ba3—Te6—Ba2 <sup>xii</sup>                 | 175.05 (2)  |
| Te13—Ba4—Te13 <sup>vii</sup>                | 145.938 (18) | Ba7 <sup>ix</sup> —Te6—Ba2 <sup>xii</sup>  | 82.371 (19) |
| Te8—Ba4—Te12                                | 86.267 (17)  | Ba1—Te6—Ba2 <sup>xii</sup>                 | 95.44 (2)   |
| Te13—Ba4—Te12                               | 64.103 (18)  | Sb3—Te7—Sb2 <sup>ii</sup>                  | 98.69 (3)   |
| Te13 <sup>vii</sup> —Ba4—Te12               | 148.15 (2)   | Sb3—Te7—Ba3 <sup>ii</sup>                  | 92.14 (2)   |
| Te8—Ba4—Te16 <sup>vi</sup>                  | 136.55 (2)   | Sb2 <sup>ii</sup> —Te7—Ba3 <sup>ii</sup>   | 92.54 (2)   |
| Te13—Ba4—Te16 <sup>vi</sup>                 | 125.89 (2)   | Sb3—Te7—Ba2 <sup>xii</sup>                 | 105.37 (2)  |

|                                             |              |                                           |             |
|---------------------------------------------|--------------|-------------------------------------------|-------------|
| Te13 <sup>vii</sup> —Ba4—Te16 <sup>vi</sup> | 77.726 (16)  | Sb2 <sup>ii</sup> —Te7—Ba2 <sup>xii</sup> | 93.03 (2)   |
| Te12—Ba4—Te16 <sup>vi</sup>                 | 88.747 (19)  | Ba3 <sup>ii</sup> —Te7—Ba2 <sup>xii</sup> | 160.58 (2)  |
| Te8—Ba4—Te10                                | 73.308 (17)  | Sb2—Te8—Ba4                               | 99.80 (2)   |
| Te13—Ba4—Te10                               | 129.124 (19) | Sb2—Te8—Ba1                               | 99.19 (2)   |
| Te13 <sup>vii</sup> —Ba4—Te10               | 81.054 (18)  | Ba4—Te8—Ba1                               | 160.63 (2)  |
| Te12—Ba4—Te10                               | 67.097 (18)  | Sb2—Te8—Ba3                               | 94.31 (2)   |
| Te16 <sup>vi</sup> —Ba4—Te10                | 65.082 (16)  | Ba4—Te8—Ba3                               | 95.631 (18) |
| Te8—Ba4—Te11                                | 70.279 (16)  | Ba1—Te8—Ba3                               | 86.722 (18) |
| Te13—Ba4—Te11                               | 72.063 (17)  | Sb2—Te8—Ba3 <sup>ii</sup>                 | 105.69 (2)  |
| Te13 <sup>vii</sup> —Ba4—Te11               | 74.382 (17)  | Ba4—Te8—Ba3 <sup>ii</sup>                 | 84.217 (17) |
| Te12—Ba4—Te11                               | 129.956 (19) | Ba1—Te8—Ba3 <sup>ii</sup>                 | 87.008 (18) |
| Te16 <sup>vi</sup> —Ba4—Te11                | 138.292 (19) | Ba3—Te8—Ba3 <sup>ii</sup>                 | 159.75 (2)  |
| Te10—Ba4—Te11                               | 137.56 (2)   | Si1—Te9—Ba7 <sup>vi</sup>                 | 87.18 (6)   |
| Te8—Ba4—Te15                                | 149.24 (2)   | Si1—Te9—Ba7 <sup>x</sup>                  | 76.06 (6)   |
| Te13—Ba4—Te15                               | 84.715 (17)  | Ba7 <sup>vi</sup> —Te9—Ba7 <sup>x</sup>   | 161.92 (2)  |
| Te13 <sup>vii</sup> —Ba4—Te15               | 83.511 (16)  | Si1—Te9—Ba6 <sup>vi</sup>                 | 75.39 (6)   |
| Te12—Ba4—Te15                               | 117.789 (19) | Ba7 <sup>vi</sup> —Te9—Ba6 <sup>vi</sup>  | 94.755 (18) |
| Te16 <sup>vi</sup> —Ba4—Te15                | 67.219 (16)  | Ba7 <sup>x</sup> —Te9—Ba6 <sup>vi</sup>   | 87.637 (17) |
| Te10—Ba4—Te15                               | 131.922 (19) | Si1—Te9—Ba2                               | 86.32 (6)   |
| Te11—Ba4—Te15                               | 79.267 (17)  | Ba7 <sup>vi</sup> —Te9—Ba2                | 79.918 (16) |
| Te8—Ba4—Ba3 <sup>ii</sup>                   | 49.316 (14)  | Ba7 <sup>x</sup> —Te9—Ba2                 | 92.096 (17) |
| Te13—Ba4—Ba3 <sup>ii</sup>                  | 48.856 (13)  | Ba6 <sup>vi</sup> —Te9—Ba2                | 161.22 (2)  |
| Te13 <sup>vii</sup> —Ba4—Ba3 <sup>ii</sup>  | 133.436 (17) | Si1—Te10—Sb2                              | 80.39 (6)   |
| Te12—Ba4—Ba3 <sup>ii</sup>                  | 47.982 (14)  | Si1—Te10—Ba7 <sup>vi</sup>                | 87.03 (6)   |

|                                              |              |                                           |             |
|----------------------------------------------|--------------|-------------------------------------------|-------------|
| Te16 <sup>vi</sup> —Ba4—Ba3 <sup>ii</sup>    | 136.079 (18) | Sb2—Te10—Ba7 <sup>vi</sup>                | 99.53 (2)   |
| Te10—Ba4—Ba3 <sup>ii</sup>                   | 87.392 (15)  | Si1—Te10—Ba4                              | 89.31 (6)   |
| Te11—Ba4—Ba3 <sup>ii</sup>                   | 85.152 (14)  | Sb2—Te10—Ba4                              | 93.66 (2)   |
| Te15—Ba4—Ba3 <sup>ii</sup>                   | 133.571 (17) | Ba7 <sup>vi</sup> —Te10—Ba4               | 165.52 (2)  |
| Te15—Ba5—Te14                                | 71.868 (17)  | Sb3—Te11—Sb4 <sup>ix</sup>                | 104.86 (2)  |
| Te15—Ba5—Te15 <sup>ii</sup>                  | 150.812 (18) | Sb3—Te11—Ba4                              | 92.44 (2)   |
| Te14—Ba5—Te15 <sup>ii</sup>                  | 78.944 (18)  | Sb4 <sup>ix</sup> —Te11—Ba4               | 100.07 (2)  |
| Te15—Ba5—Te16                                | 88.309 (17)  | Sb3—Te11—Ba7 <sup>ix</sup>                | 105.45 (2)  |
| Te14—Ba5—Te16                                | 132.64 (2)   | Sb4 <sup>ix</sup> —Te11—Ba7 <sup>ix</sup> | 85.61 (2)   |
| Te15 <sup>ii</sup> —Ba5—Te16                 | 112.094 (19) | Ba4—Te11—Ba7 <sup>ix</sup>                | 159.27 (2)  |
| Te15—Ba5—Te16 <sup>viii</sup>                | 136.77 (2)   | Si1—Te12—Ba6 <sup>vi</sup>                | 78.16 (6)   |
| Te14—Ba5—Te16 <sup>viii</sup>                | 142.24 (2)   | Si1—Te12—Ba7 <sup>x</sup>                 | 76.81 (6)   |
| Te15 <sup>ii</sup> —Ba5—Te16 <sup>viii</sup> | 69.765 (17)  | Ba6 <sup>vi</sup> —Te12—Ba7 <sup>x</sup>  | 90.51 (2)   |
| Te16—Ba5—Te16 <sup>viii</sup>                | 80.178 (18)  | Si1—Te12—Ba3 <sup>ii</sup>                | 92.06 (6)   |
| Te15—Ba5—Te13                                | 88.110 (17)  | Ba6 <sup>vi</sup> —Te12—Ba3 <sup>ii</sup> | 169.18 (2)  |
| Te14—Ba5—Te13                                | 78.995 (17)  | Ba7 <sup>x</sup> —Te12—Ba3 <sup>ii</sup>  | 91.745 (19) |
| Te15 <sup>ii</sup> —Ba5—Te13                 | 86.493 (17)  | Si1—Te12—Ba4                              | 91.82 (6)   |
| Te16—Ba5—Te13                                | 144.51 (2)   | Ba6 <sup>vi</sup> —Te12—Ba4               | 91.979 (19) |
| Te16 <sup>viii</sup> —Ba5—Te13               | 78.519 (16)  | Ba7 <sup>x</sup> —Te12—Ba4                | 167.60 (2)  |
| Te15—Ba5—Te18                                | 88.610 (16)  | Ba3 <sup>ii</sup> —Te12—Ba4               | 83.635 (19) |
| Te14—Ba5—Te18                                | 73.039 (17)  | Sb3—Te13—Ba5                              | 102.97 (2)  |
| Te15 <sup>ii</sup> —Ba5—Te18                 | 82.687 (17)  | Sb3—Te13—Ba4                              | 96.14 (2)   |
| Te16—Ba5—Te18                                | 63.657 (17)  | Ba5—Te13—Ba4                              | 92.529 (17) |
| Te16 <sup>viii</sup> —Ba5—Te18               | 121.437 (18) | Sb3—Te13—Ba4 <sup>ii</sup>                | 96.95 (2)   |



|                                              |              |                                             |             |
|----------------------------------------------|--------------|---------------------------------------------|-------------|
| Te13—Ba5—Te18                                | 151.45 (2)   | Ba5—Te13—Ba4 <sup>ii</sup>                  | 87.891 (17) |
| Te15—Ba5—Te17 <sup>ix</sup>                  | 73.248 (17)  | Ba4—Te13—Ba4 <sup>ii</sup>                  | 166.47 (2)  |
| Te14—Ba5—Te17 <sup>ix</sup>                  | 138.31 (2)   | Sb3—Te13—Ba3 <sup>ii</sup>                  | 92.16 (2)   |
| Te15 <sup>ii</sup> —Ba5—Te17 <sup>ix</sup>   | 132.994 (19) | Ba5—Te13—Ba3 <sup>ii</sup>                  | 164.64 (2)  |
| Te16—Ba5—Te17 <sup>ix</sup>                  | 67.425 (17)  | Ba4—Te13—Ba3 <sup>ii</sup>                  | 83.091 (17) |
| Te16 <sup>viii</sup> —Ba5—Te17 <sup>ix</sup> | 63.819 (17)  | Ba4 <sup>ii</sup> —Te13—Ba3 <sup>ii</sup>   | 92.972 (17) |
| Te13—Ba5—Te17 <sup>ix</sup>                  | 77.751 (17)  | Si2—Te14—Ba5                                | 86.49 (6)   |
| Te18—Ba5—Te17 <sup>ix</sup>                  | 128.015 (18) | Si2—Te14—Ba6 <sup>vi</sup>                  | 88.86 (6)   |
| Te15—Ba5—Ba6                                 | 49.045 (13)  | Ba5—Te14—Ba6 <sup>vi</sup>                  | 153.23 (2)  |
| Te14—Ba5—Ba6                                 | 87.449 (15)  | Si2—Te15—Ba5                                | 85.91 (5)   |
| Te15 <sup>ii</sup> —Ba5—Ba6                  | 130.695 (17) | Si2—Te15—Ba5 <sup>vii</sup>                 | 80.91 (5)   |
| Te16—Ba5—Ba6                                 | 49.514 (13)  | Ba5—Te15—Ba5 <sup>vii</sup>                 | 166.81 (2)  |
| Te16 <sup>viii</sup> —Ba5—Ba6                | 129.057 (18) | Si2—Te15—Ba6                                | 90.80 (5)   |
| Te13—Ba5—Ba6                                 | 137.120 (18) | Ba5—Te15—Ba6                                | 83.340 (16) |
| Te18—Ba5—Ba6                                 | 48.076 (13)  | Ba5 <sup>vii</sup> —Te15—Ba6                | 97.194 (17) |
| Te17 <sup>ix</sup> —Ba5—Ba6                  | 86.617 (15)  | Si2—Te15—Ba4                                | 75.62 (5)   |
| Te12 <sup>ix</sup> —Ba6—Te18                 | 126.39 (2)   | Ba5—Te15—Ba4                                | 90.569 (17) |
| Te12 <sup>ix</sup> —Ba6—Te15                 | 136.89 (2)   | Ba5 <sup>vii</sup> —Te15—Ba4                | 85.775 (17) |
| Te18—Ba6—Te15                                | 90.222 (17)  | Ba6—Te15—Ba4                                | 165.52 (2)  |
| Te12 <sup>ix</sup> —Ba6—Te18 <sup>vii</sup>  | 76.384 (17)  | Si2 <sup>ix</sup> —Te16—Ba5                 | 92.60 (6)   |
| Te18—Ba6—Te18 <sup>vii</sup>                 | 145.957 (18) | Si2 <sup>ix</sup> —Te16—Ba5 <sup>viii</sup> | 80.96 (6)   |
| Te15—Ba6—Te18 <sup>vii</sup>                 | 84.176 (17)  | Ba5—Te16—Ba5 <sup>viii</sup>                | 99.821 (18) |
| Te12 <sup>ix</sup> —Ba6—Te9 <sup>ix</sup>    | 70.744 (18)  | Si2 <sup>ix</sup> —Te16—Ba4 <sup>ix</sup>   | 78.47 (5)   |
| Te18—Ba6—Te9 <sup>ix</sup>                   | 82.737 (17)  | Ba5—Te16—Ba4 <sup>ix</sup>                  | 167.52 (2)  |

|                                             |              |                                             |             |
|---------------------------------------------|--------------|---------------------------------------------|-------------|
| Te15—Ba6—Te9 <sup>ix</sup>                  | 144.38 (2)   | Ba5 <sup>viii</sup> —Te16—Ba4 <sup>ix</sup> | 87.479 (19) |
| Te18 <sup>vii</sup> —Ba6—Te9 <sup>ix</sup>  | 82.580 (17)  | Si2 <sup>ix</sup> —Te16—Ba6                 | 90.41 (6)   |
| Te12 <sup>ix</sup> —Ba6—Te16                | 90.13 (2)    | Ba5—Te16—Ba6                                | 82.194 (18) |
| Te18—Ba6—Te16                               | 64.807 (17)  | Ba5 <sup>viii</sup> —Te16—Ba6               | 171.20 (2)  |
| Te15—Ba6—Te16                               | 86.086 (17)  | Ba4 <sup>ix</sup> —Te16—Ba6                 | 89.106 (18) |
| Te18 <sup>vii</sup> —Ba6—Te16               | 147.46 (2)   | Si2—Te17—Sb4                                | 88.23 (5)   |
| Te9 <sup>ix</sup> —Ba6—Te16                 | 121.100 (19) | Si2—Te17—Ba6                                | 87.43 (6)   |
| Te12 <sup>ix</sup> —Ba6—Te17                | 139.48 (2)   | Sb4—Te17—Ba6                                | 94.61 (2)   |
| Te18—Ba6—Te17                               | 70.113 (17)  | Si2—Te17—Ba5 <sup>vi</sup>                  | 86.94 (6)   |
| Te15—Ba6—Te17                               | 68.523 (16)  | Sb4—Te17—Ba5 <sup>vi</sup>                  | 106.76 (2)  |
| Te18 <sup>vii</sup> —Ba6—Te17               | 76.627 (17)  | Ba6—Te17—Ba5 <sup>vi</sup>                  | 157.70 (2)  |
| Te9 <sup>ix</sup> —Ba6—Te17                 | 76.278 (17)  | Sb4—Te18—Ba6                                | 98.29 (2)   |
| Te16—Ba6—Te17                               | 127.621 (19) | Sb4—Te18—Ba6 <sup>ii</sup>                  | 96.36 (2)   |
| Te12 <sup>ix</sup> —Ba6—Te14 <sup>ix</sup>  | 68.719 (18)  | Ba6—Te18—Ba6 <sup>ii</sup>                  | 165.11 (2)  |
| Te18—Ba6—Te14 <sup>ix</sup>                 | 129.176 (19) | Sb4—Te18—Ba7                                | 89.50 (2)   |
| Te15—Ba6—Te14 <sup>ix</sup>                 | 70.274 (17)  | Ba6—Te18—Ba7                                | 95.099 (17) |
| Te18 <sup>vii</sup> —Ba6—Te14 <sup>ix</sup> | 80.148 (17)  | Ba6 <sup>ii</sup> —Te18—Ba7                 | 87.692 (17) |
| Te9 <sup>ix</sup> —Ba6—Te14 <sup>ix</sup>   | 138.59 (2)   | Sb4—Te18—Ba5                                | 102.05 (2)  |
| Te16—Ba6—Te14 <sup>ix</sup>                 | 67.344 (17)  | Ba6—Te18—Ba5                                | 80.562 (16) |
| Te17—Ba6—Te14 <sup>ix</sup>                 | 134.18 (2)   | Ba6 <sup>ii</sup> —Te18—Ba5                 | 93.774 (17) |
| Te12 <sup>ix</sup> —Ba6—Ba5                 | 137.342 (19) | Ba7—Te18—Ba5                                | 168.10 (2)  |
| Te18—Ba6—Ba5                                | 51.363 (13)  | Te2 <sup>ii</sup> —Te19—Te2 <sup>i</sup>    | 180.0 (4)   |
| Te15—Ba6—Ba5                                | 47.615 (13)  | Te2 <sup>ii</sup> —Te19—Te1 <sup>ii</sup>   | 18.83 (19)  |
| Te18 <sup>vii</sup> —Ba6—Ba5                | 131.766 (17) | Te2 <sup>i</sup> —Te19—Te1 <sup>ii</sup>    | 161.17 (19) |

|                                           |              |                                              |              |
|-------------------------------------------|--------------|----------------------------------------------|--------------|
| Te9 <sup>ix</sup> —Ba6—Ba5                | 133.863 (18) | Te2 <sup>ii</sup> —Te19—Te1 <sup>i</sup>     | 161.17 (19)  |
| Te16—Ba6—Ba5                              | 48.293 (13)  | Te2 <sup>i</sup> —Te19—Te1 <sup>i</sup>      | 18.83 (19)   |
| Te17—Ba6—Ba5                              | 82.934 (14)  | Te1 <sup>ii</sup> —Te19—Te1 <sup>i</sup>     | 180.00 (4)   |
| Te14 <sup>ix</sup> —Ba6—Ba5               | 83.962 (15)  | Te2 <sup>ii</sup> —Te19—Ba2 <sup>xii</sup>   | 116.83 (13)  |
| Te6 <sup>vi</sup> —Ba7—Te4 <sup>ix</sup>  | 70.252 (18)  | Te2 <sup>i</sup> —Te19—Ba2 <sup>xii</sup>    | 63.17 (13)   |
| Te6 <sup>vi</sup> —Ba7—Te12 <sup>x</sup>  | 86.90 (2)    | Te1 <sup>ii</sup> —Te19—Ba2 <sup>xii</sup>   | 112.020 (16) |
| Te4 <sup>ix</sup> —Ba7—Te12 <sup>x</sup>  | 126.23 (2)   | Te1 <sup>i</sup> —Te19—Ba2 <sup>xii</sup>    | 67.980 (16)  |
| Te6 <sup>vi</sup> —Ba7—Te10 <sup>ix</sup> | 137.77 (2)   | Te2 <sup>ii</sup> —Te19—Ba2 <sup>xiii</sup>  | 63.17 (13)   |
| Te4 <sup>ix</sup> —Ba7—Te10 <sup>ix</sup> | 78.105 (18)  | Te2 <sup>i</sup> —Te19—Ba2 <sup>xiii</sup>   | 116.83 (13)  |
| Te12 <sup>x</sup> —Ba7—Te10 <sup>ix</sup> | 135.06 (2)   | Te1 <sup>ii</sup> —Te19—Ba2 <sup>xiii</sup>  | 67.980 (16)  |
| Te6 <sup>vi</sup> —Ba7—Te9 <sup>ix</sup>  | 84.505 (17)  | Te1 <sup>i</sup> —Te19—Ba2 <sup>xiii</sup>   | 112.020 (16) |
| Te4 <sup>ix</sup> —Ba7—Te9 <sup>ix</sup>  | 92.587 (17)  | Ba2 <sup>xii</sup> —Te19—Ba2 <sup>xiii</sup> | 180.000 (18) |
| Te12 <sup>x</sup> —Ba7—Te9 <sup>ix</sup>  | 134.08 (2)   | Te2 <sup>ii</sup> —Te19—Ba1 <sup>xiv</sup>   | 86.65 (19)   |
| Te10 <sup>ix</sup> —Ba7—Te9 <sup>ix</sup> | 69.451 (17)  | Te2 <sup>i</sup> —Te19—Ba1 <sup>xiv</sup>    | 93.35 (19)   |
| Te6 <sup>vi</sup> —Ba7—Te9 <sup>x</sup>   | 124.99 (2)   | Te1 <sup>ii</sup> —Te19—Ba1 <sup>xiv</sup>   | 67.872 (19)  |
| Te4 <sup>ix</sup> —Ba7—Te9 <sup>x</sup>   | 83.951 (18)  | Te1 <sup>i</sup> —Te19—Ba1 <sup>xiv</sup>    | 112.128 (19) |
| Te12 <sup>x</sup> —Ba7—Te9 <sup>x</sup>   | 70.292 (18)  | Ba2 <sup>xii</sup> —Te19—Ba1 <sup>xiv</sup>  | 85.792 (15)  |
| Te10 <sup>ix</sup> —Ba7—Te9 <sup>x</sup>  | 76.875 (18)  | Ba2 <sup>xiii</sup> —Te19—Ba1 <sup>xiv</sup> | 94.208 (15)  |
| Te9 <sup>ix</sup> —Ba7—Te9 <sup>x</sup>   | 146.115 (19) | Te2 <sup>ii</sup> —Te19—Ba1                  | 93.35 (19)   |
| Te6 <sup>vi</sup> —Ba7—Te18               | 139.69 (2)   | Te2 <sup>i</sup> —Te19—Ba1                   | 86.65 (19)   |
| Te4 <sup>ix</sup> —Ba7—Te18               | 148.23 (2)   | Te1 <sup>ii</sup> —Te19—Ba1                  | 112.129 (19) |
| Te12 <sup>x</sup> —Ba7—Te18               | 75.325 (17)  | Te1 <sup>i</sup> —Te19—Ba1                   | 67.871 (19)  |
| Te10 <sup>ix</sup> —Ba7—Te18              | 70.816 (16)  | Ba2 <sup>xii</sup> —Te19—Ba1                 | 94.208 (15)  |
| Te9 <sup>ix</sup> —Ba7—Te18               | 82.749 (17)  | Ba2 <sup>xiii</sup> —Te19—Ba1                | 85.792 (15)  |

|                                                 |             |                                               |             |
|-------------------------------------------------|-------------|-----------------------------------------------|-------------|
| Te9 <sup>x</sup> —Ba7—Te18                      | 82.819 (16) | Ba1 <sup>xiv</sup> —Te19—Ba1                  | 180.0       |
|                                                 |             |                                               |             |
| Sb1 <sup>i</sup> —Te1—Te2—Te19 <sup>iii</sup>   | -121.8 (3)  | Ba1—Te1—Te2—Sb2                               | 95.84 (18)  |
| Sb2—Te1—Te2—Te19 <sup>iii</sup>                 | 98.65 (15)  | Ba2 <sup>i</sup> —Te1—Te2—Sb2                 | -166.8 (2)  |
| Ba1—Te1—Te2—Te19 <sup>iii</sup>                 | -165.5 (3)  | Ba1 <sup>iii</sup> —Te1—Te2—Sb2               | -103.9 (3)  |
| Ba2 <sup>i</sup> —Te1—Te2—Te19 <sup>iii</sup>   | -68.11 (19) | Sb1 <sup>i</sup> —Te1—Te2—Ba1                 | 43.7 (5)    |
| Ba1 <sup>iii</sup> —Te1—Te2—Te19 <sup>iii</sup> | -5.2 (5)    | Sb2—Te1—Te2—Ba1                               | -95.84 (18) |
| Sb1 <sup>i</sup> —Te1—Te2—Te3                   | -1.4 (19)   | Te19 <sup>iii</sup> —Te1—Te2—Ba1              | 165.5 (3)   |
| Sb2—Te1—Te2—Te3                                 | -141.0 (16) | Ba2 <sup>i</sup> —Te1—Te2—Ba1                 | 97.4 (3)    |
| Te19 <sup>iii</sup> —Te1—Te2—Te3                | 120.3 (16)  | Ba1 <sup>iii</sup> —Te1—Te2—Ba1               | 160.30 (19) |
| Ba1—Te1—Te2—Te3                                 | -45.2 (15)  | Sb1 <sup>i</sup> —Te1—Te2—Ba2 <sup>i</sup>    | -53.6 (5)   |
| Ba2 <sup>i</sup> —Te1—Te2—Te3                   | 52.2 (15)   | Sb2—Te1—Te2—Ba2 <sup>i</sup>                  | 166.8 (2)   |
| Ba1 <sup>iii</sup> —Te1—Te2—Te3                 | 115.1 (15)  | Te19 <sup>iii</sup> —Te1—Te2—Ba2 <sup>i</sup> | 68.11 (19)  |
| Sb1 <sup>i</sup> —Te1—Te2—Sb2                   | 139.6 (3)   | Ba1—Te1—Te2—Ba2 <sup>i</sup>                  | -97.4 (3)   |
| Te19 <sup>iii</sup> —Te1—Te2—Sb2                | -98.65 (15) | Ba1 <sup>iii</sup> —Te1—Te2—Ba2 <sup>i</sup>  | 62.9 (5)    |

Symmetry codes: (i)  $-x, y-1/2, -z+1/2$ ; (ii)  $x, -y+1/2, z-1/2$ ; (iii)  $-x, y+1/2, -z+1/2$ ; (iv)  $x, -y+3/2, z-1/2$ ; (v)  $x, y+1, z$ ; (vi)  $-x+1, y+1/2, -z+1/2$ ; (vii)  $x, -y+1/2, z+1/2$ ; (viii)  $-x+1, -y, -z$ ; (ix)  $-x+1, y-1/2, -z+1/2$ ; (x)  $-x+1, -y+1, -z$ ; (xi)  $x, -y+3/2, z+1/2$ ; (xii)  $x, y-1, z$ ; (xiii)  $-x, -y+1, -z$ ; (xiv)  $-x, -y, -z$ .

### References:

- 1 R. M. Martin, *Electronic Structure: Basic Theory and Practical Methods*, Cambridge University Press, Cambridge, 2004.
- 2 M. Gajdoš, K. Hummer, G. Kresse, J. Furthmüller and F. Bechstedt, *Phys. Rev. B*, 2006, **73**, 045112.
- 3 G. K. H. Madsen, J. Carrete and M. J. Verstraete, *Comput. Phys. Commun.*, 2018, **231**,

140–145.
